# Supplementary material for: Preparation of Viable Human Neurites for Neurobiological and Neurodegeneration Studies
Source: MDPI journal article supplement (doi:10.3390/cells13030242), 2024-01-27
Supplement: s1 [file s1]

# Preparation of viable human neurites for neurobiological and neurodegeneration studies

Markus Brüll, Nils Geese, Ivana Celardo, Michael Laumann and Marcel Leist

| <b>Table of Contents</b> |                                                                               |         |
|--------------------------|-------------------------------------------------------------------------------|---------|
| Figure S1                | SEM images of plated spheroids covered by Matrigel                            | page 2  |
| Figure S2                | Details on the procedure and normal variability of NOC production             | page 3f |
| Figure S3                | Quantification of relative RNA abundances in neurites                         | page 5  |
| Figure S4                | Failure of calpain inhibitors to rescue NOC from axotomy induced degeneration | page 6  |
| Table S1                 | Primers used for real-time qPCR                                               | page 7  |
| Table S2                 | Antibodies used in this study                                                 | page 8  |

**A**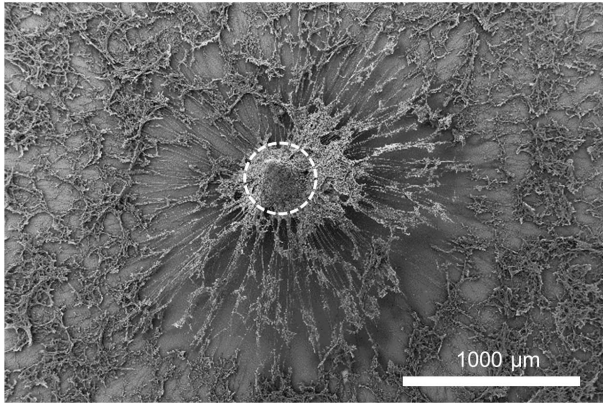**B**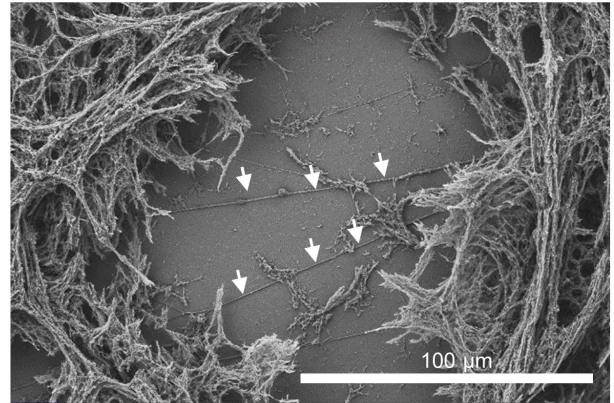

**Supplementary Figure S1: SEM images of plated spheroids covered by Matrigel**

**A:** SEM image of an intact 2.5D spheroid covered by Matrigel. The spheroid is representative of the standard procedure to produce NOC, as described in fig. 1. It was generated and plated into a 1:40 Matrigel suspension as described in fig. 1. Note that for better neurite display (e.g. fig. 3) the Matrigel amount was reduced (minimal Matrigel coating by removing suspension before plating). The dotted circle indicates the central spheroid. **B:** Detail image of Matrigel-covered surface. White arrows indicate neurites growing below the Matrigel layer.

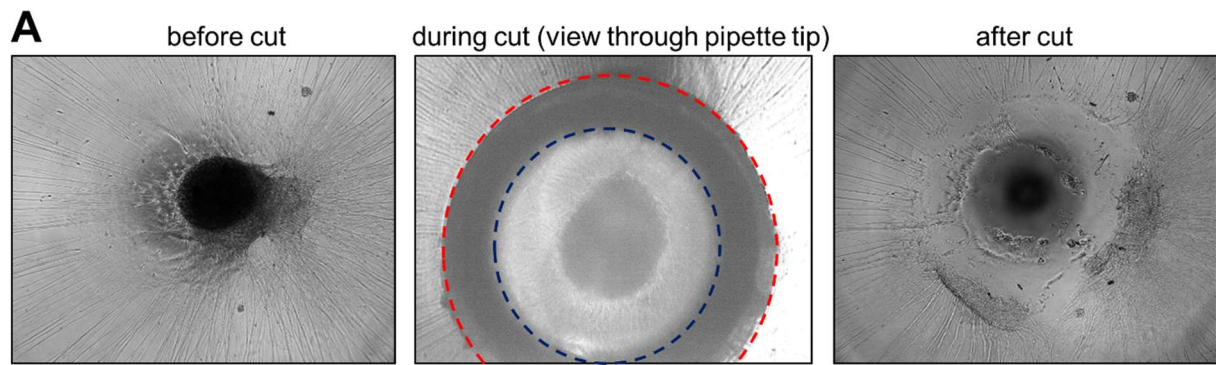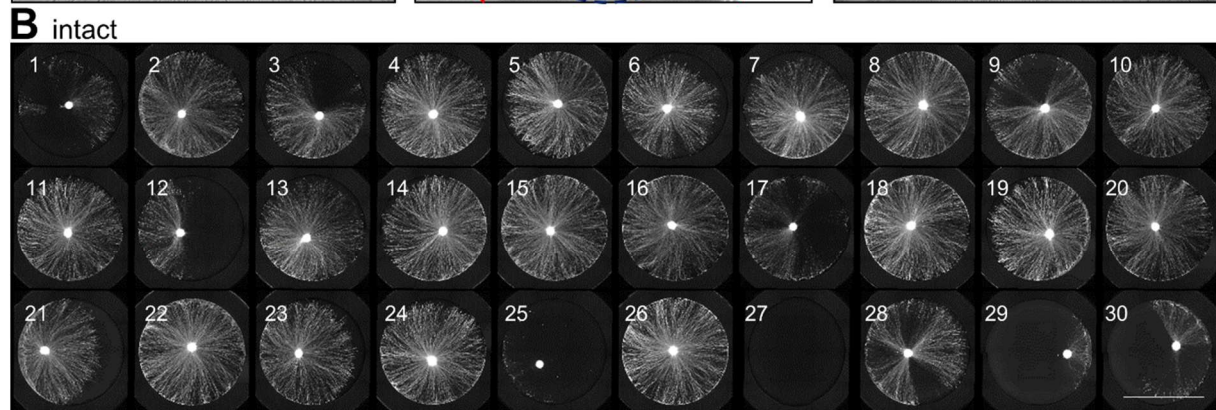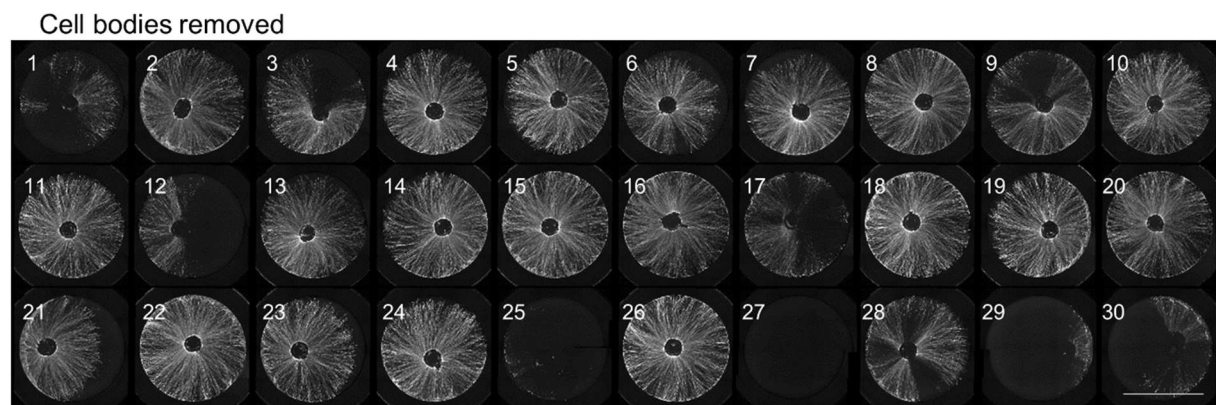

**C**

| n = 30                     | accepted      | Not accepted     |              |           |
|----------------------------|---------------|------------------|--------------|-----------|
| Neurite quality            | good neurites | Partially absent | Fully absent | empty     |
| Score (n)<br>Abundance (%) | 20<br>(67%)   | 7<br>(23%)       | 2<br>(7%)    | 1<br>(3%) |
| Example well               | Well #4       | Well #17         | Well #25     | Well #27  |

## **Supplementary Figure S2: Details on the procedure and normal variability of NOC production**

**A:** Phase contrast images of 2.5D spheroids before, during and after axotomy and cell body removal. The red dotted circle indicates the outer border of the pipette tip, the blue dotted circle indicates the inner lumen. The smooth grey ring in between is the plastic wall of the pipette tip used for cutting. Note in the right image, that immediately after the cutting there is neurite contraction and neurite debris at the inner cut site. **B:** Display 30 exemplary wells of plated spheroids at 5 days after plating. Upper images are before the cut; lower images are after cell body removal. Spheroids were stained with calcein-AM and whole wells of a 96 well plate were imaged by epifluorescence microscopy. For each micrograph displayed, 12 microscope images (3x4) were stitched together per well. Scale bar = 5 mm. **C:** For subsequent analysis, only spheroids which showed full radial neurite outgrowth were used. Here, the analysis of the quality control of the 30 wells shown in B is given as a representative example.

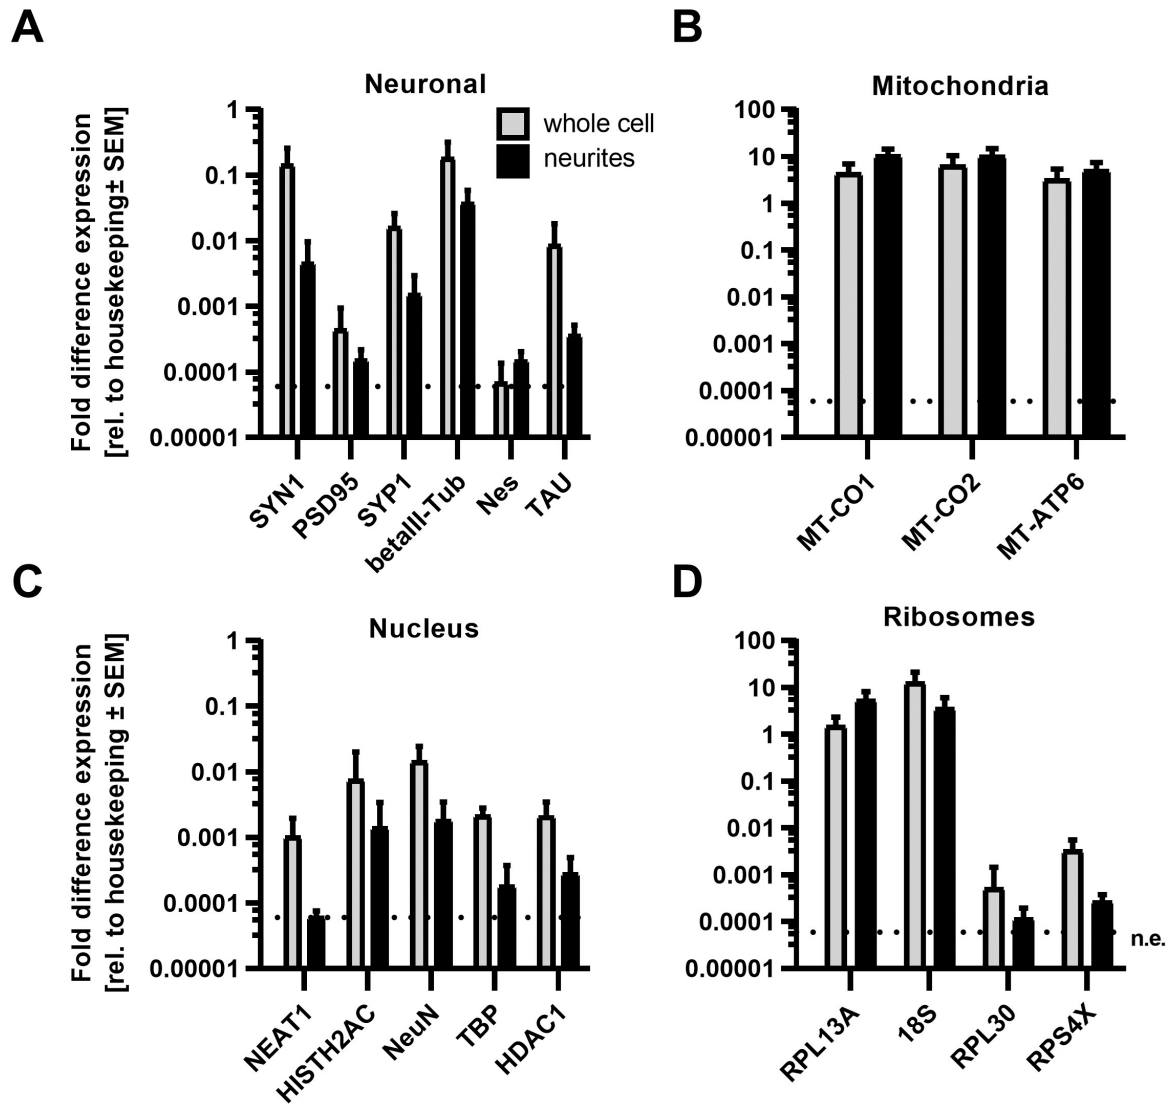

**Supplementary Figure S3: Quantification of relative RNA abundances in neurites**

RNA was isolated from NOC or whole cell preparations. The same amount of total RNA was used for analysis by real-time quantitative PCR (RT-qPCR). Expression data was normalized to the geometric mean of ACTB and RPL13A levels (housekeeping genes). Relative expression to housekeeping genes is shown. Genes which were not detected after cycle 40 were regarded as not expressed (n.e.). **A:** Neuronal marker genes. **B:** Genes expressed by mitochondria. **C:** Genes of proteins typically found in the nucleus. **D:** Genes encoding for ribosomal subunit proteins or ribosomal RNA.

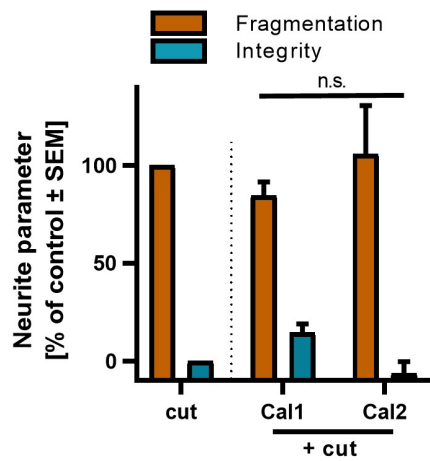

#### **Supplementary Figure S4: Failure of calpain inhibitors to rescue NOC from axotomy induced degeneration**

Cultures were treated with the calpain inhibitors 1 (Cal1) and 2 (Cal2) before axotomy. 18 h after axotomy, neurites were stained with calcein-AM and imaged by epifluorescence microscopy. Quantification of neurite fragmentation and integrity 18 h after axotomy is shown.

**Supplementary table S1: Primers used for real-time qPCR**

| target transcript | sequence forward primer | T <sub>m</sub> [°C] | sequence reverse primer     | T <sub>m</sub> [°C] | product size [bp] |
|-------------------|-------------------------|---------------------|-----------------------------|---------------------|-------------------|
| ACTB              | GCACAGAGCCTCGCCTT       | 59.7                | GTTGTCGACGACGAGCG           | 58.6                | 93                |
| RPL13A            | GGTATGCTGCCCCACAAAACC   | 62.1                | CTGTCAGTGCCTGGTACTTCCA      | 61.9                | 205               |
| GAPDH             | ATGGAGAAGGCTGGGGCTCA    | 63.1                | AGTGATGGCATGGACTGTGGTCAT    | 64.2                | 234               |
| MT-CO1            | TACGTTGTAGCCCACTTCCAC   | 60.0                | GAGTAACGTCGGGGCATTCC        | 60.8                | 209               |
| MT-CO2            | CCTCATCGCCCTCCCATCCC    | 64.3                | TCAAGGAGTCGCAGGTCGCC        | 64.6                | 189               |
| MT-ATP6           | TTCAACCAATAGCCCTGGCC    | 60.3                | GTAGGCTTGGATTAAGGCGAC       | 58.8                | 185               |
| 18S               | GACTCAACACGGGAAACCTCACC | 63.5                | TCTAAGAAGTTGGGGGACGCCG      | 64.3                | 204               |
| DLG4              | CACTCCTCACAGTGCTGCAT    | 60.3                | TGTCTTCATCTTGGTAGCGG        | 57.3                | 111               |
| PARK7             | AAGGGCCTGATAGCCGCCAT    | 63.9                | GCGCAAACCTCGAAGCTGGTC       | 62.5                | 202               |
| RPL30             | TGAAGAGCTTTGCATTGTGG    | 56.9                | CGGAGTTACAAATGGCAACC        | 57.4                | 137               |
| HDAC1             | CACCCGGAGGAAAGTCTGT     | 58.9                | GGGCGATAGATTTCATTTTT        | 54.6                | 150               |
| SYP1              | GGTGGCTGGGGGTCAGTTCC    | 64.9                | TTGGTGCAGCCTGAAGGGGT        | 64.2                | 199               |
| TBP               | GGGCACCACTCCACTGTATC    | 60.1                | GCAGCAAACCGCTTGGGATTATATTCG | 65.1                | 198               |
| TUBB3             | AACTACGTGGGCGACTCGGA    | 63.4                | GTTGTTGCCGGCCCCACTCT        | 65.5                | 198               |
| RPS4X             | TGCAGCAGTTAGGGAACCCATG  | 62.9                | CACCTTGATGAGGGGATCGGGG      | 64.4                | 198               |
| TAU               | CCATGCCAGACCTGAAGAAT    | 57.6                | CACACTTGGACTGGACGTTG        | 59.1                | 129               |
| RBFOX3            | AGCCCGGGAGAAGCTGAATG    | 62.3                | GTGCCGGTGGTGGGGTAGGG        | 67.1                | 195               |
| SYN1              | TCAGACCTTCTACCCCAATCA   | 57.8                | GTCCTGGAAGTCATGCTGGT        | 59.7                | 127               |
| NEAT1             | GCCCATGAATGCCAGCAGGC    | 64.8                | GGCTCCATCTGCAAGCTCCA        | 62.6                | 198               |
| HIST1H2AC         | CAACTACGCAGAGCGGGTTG    | 61.6                | TGAGCAATGGTCACCCGGCC        | 65.3                | 201               |

**Supplementary table S2: Antibodies used in this study**

| <b>target</b>              | <b>species</b> | <b>stock concentration</b> | <b>dilution</b> | <b>supplier</b> | <b>catalog number</b> |
|----------------------------|----------------|----------------------------|-----------------|-----------------|-----------------------|
| $\alpha$ -Tubulin          | rabbit         | 8 $\mu$ g/ml               | 1:5000          | Cell Signaling  | 2125                  |
| $\beta$ -Actin             | mouse          | 2.0 - 2.5 mg/ml            | 1:5000          | Sigma-Aldrich   | A5228                 |
| Tom20                      | rabbit         | 200 $\mu$ g/ml             | 1:1000          | SantaCruz       | sc-11415              |
| Histone H3                 | rabbit         | 9 $\mu$ g/ml               | 1:1000          | Cell Signalling | 9715S                 |
| $\beta$ III-Tubulin        | mouse          | 1.0 mg/ml                  | 1:500           | BioLegend       | 801202                |
| Anti-mouse-IgG-HRP         | goat           | 0.8 mg/ml                  | 1:10 000        | Jackson         | 115-036-068           |
| Anti-rabbit-IgG-HRP        | goat           | 1.0 mg/ml                  | 1:10 000        | Biozol          | VEC-PI-1000           |
| Anti-mouse-IgG2a-Alexa-647 | goat           | 2 mg/ml                    | 1:1000          | Invitrogen      | 21241                 |
